# Supplementary material for: Atypical and Unique Transmission of Monkeypox Virus during the 2022 Outbreak: An Overview of the Current State of Knowledge
Source: MDPI journal article supplement (doi:10.3390/v14092012), 2022-09-11
Supplement: s1 [file s1]

### Search Criteria:

We reviewed PubMed and Google Scholar using search terms that included “monkeypox”, “monkeypox transmission”, “smallpox”, and “smallpox transmission” (up to August 29, 2022). Titles and abstracts of articles were first reviewed to determine whether a) the study was about monkeypox or smallpox and b) it addressed the current or a historical outbreak, transmission between animals, transmission between humans, spillover events, or epidemiological data. Our PubMed search yielded 12,620 studies across both the MPXV and the smallpox literature. 216 studies were then found to be potentially relevant to this review, of which 108 included here.

**Supplemental Table S1. Case distribution.** MPX cases and deaths per country described in the current outbreak through September 2, 2022. Blue shading indicates endemic countries.

| Country                          | Cases | Deaths |
|----------------------------------|-------|--------|
| Andorra                          | 4     | 0      |
| Argentina                        | 170   | 0      |
| Aruba                            | 2     | 0      |
| Australia                        | 125   | 0      |
| Austria                          | 271   | 0      |
| Bahamas                          | 2     | 0      |
| Barbados                         | 1     | 0      |
| Belgium                          | 706   | 0      |
| Benin                            | 3     | 0      |
| Bermuda                          | 1     | 0      |
| Bolivia                          | 79    | 0      |
| Bosnia and Herzegovina           | 3     | 0      |
| Brazil                           | 5037  | 1      |
| Bulgaria                         | 4     | 0      |
| Cameroon                         | 7     | 0      |
| Canada                           | 1251  | 0      |
| Central African Republic         | 8     | 2      |
| Chile                            | 381   | 0      |
| Colombia                         | 582   | 0      |
| Costa Rica                       | 3     | 0      |
| Croatia                          | 26    | 0      |
| Cuba                             | 2     | 1      |
| Curaçao                          | 1     | 0      |
| Cyprus                           | 5     | 0      |
| Czechia                          | 48    | 0      |
| Democratic Republic of the Congo | 195   | 0      |
| Denmark                          | 175   | 0      |
| Dominican Republic               | 7     | 0      |
| Ecuador                          | 53    | 1      |
| El Salvador                      | 1     | 0      |
| Estonia                          | 10    | 0      |
| Finland                          | 22    | 0      |
| France                           | 3558  | 0      |
| Georgia                          | 2     | 0      |
| Germany                          | 3493  | 0      |
| Ghana                            | 76    | 3      |
| Gibraltar                        | 6     | 0      |
| Greece                           | 58    | 0      |
| Greenland                        | 2     | 0      |
| Guadeloupe                       | 1     | 0      |
| Guatemala                        | 8     | 0      |
| Guyana                           | 2     | 0      |
| Honduras                         | 4     | 0      |
| Hungary                          | 70    | 0      |
| Iceland                          | 12    | 0      |
| India                            | 10    | 1      |
| Indonesia                        | 1     | 0      |
| Iran                             | 1     | 0      |
| Ireland                          | 144   | 0      |
| Israel                           | 239   | 0      |

|                       |       |   |
|-----------------------|-------|---|
| Italy                 | 760   | 0 |
| Jamaica               | 5     | 0 |
| Japan                 | 4     | 0 |
| Latvia                | 4     | 0 |
| Lebanon               | 6     | 0 |
| Liberia               | 2     | 0 |
| Lithuania             | 5     | 0 |
| Luxembourg            | 53    | 0 |
| Malta                 | 31    | 0 |
| Martinique            | 1     | 0 |
| Mexico                | 504   | 0 |
| Moldova               | 2     | 0 |
| Monaco                | 3     | 0 |
| Montenegro            | 2     | 0 |
| Morocco               | 3     | 0 |
| Netherlands           | 1166  | 0 |
| New Caledonia         | 1     | 0 |
| New Zealand           | 4     | 0 |
| Nigeria               | 220   | 4 |
| Norway                | 82    | 0 |
| Panama                | 10    | 0 |
| Paraguay              | 1     | 0 |
| Peru                  | 1531  | 0 |
| Philippines           | 4     | 0 |
| Poland                | 130   | 0 |
| Portugal              | 871   | 0 |
| Qatar                 | 3     | 0 |
| Republic of the Congo | 3     | 0 |
| Romania               | 36    | 0 |
| Russia                | 1     | 0 |
| Saint Martin          | 1     | 0 |
| Saudi Arabia          | 8     | 0 |
| Serbia                | 31    | 0 |
| Singapore             | 16    | 0 |
| Slovakia              | 12    | 0 |
| Slovenia              | 43    | 0 |
| South Africa          | 5     | 0 |
| South Korea           | 1     | 0 |
| Spain                 | 6543  | 2 |
| Sudan                 | 2     | 0 |
| Sweden                | 161   | 0 |
| Switzerland           | 476   | 0 |
| Taiwan                | 3     | 0 |
| Thailand              | 7     | 0 |
| Turkey                | 1     | 0 |
| United Arab Emirates  | 16    | 0 |
| United Kingdom        | 3413  | 0 |
| United States         | 19961 | 0 |
| Uruguay               | 4     | 0 |
| Venezuela             | 3     | 0 |
